# Supplementary material for: Assessing resilience in adolescence: The Spanish adaptation of the Adolescent Resilience Questionnaire
Source: Springer Nature journal article supplement (doi:10.1186/s12955-015-0259-8), 2015-07-09
Supplement: MOESM1 [file 9764064]

**Additional file 1**

**Cronbach's alpha, item-corrected total score correlations, and factor loadings**

| Domain/Scale/Item                   | Factor loading | Correlation item-corrected total | Domain/Scale/Item                       | Factor loading | Correlation item-corrected total |
|-------------------------------------|----------------|----------------------------------|-----------------------------------------|----------------|----------------------------------|
| 1. Self                             |                |                                  | Family ( <i>continuation</i> )          |                |                                  |
| Confidence ( $\alpha=.82$ )         |                |                                  | Connectedness ( <i>continuation</i> )   |                |                                  |
| 1                                   | .63            | .50                              | 48                                      | .65            | .60                              |
| 6                                   | .69            | .60                              | 49                                      | .70            | .60                              |
| 7                                   | .60            | .53                              | Availability ( $\alpha=.80$ )           |                |                                  |
| 13                                  | .68            | .61                              | 47                                      | .64            | .55                              |
| 18                                  | .62            | .61                              | 50                                      | .74            | .70                              |
| 19                                  | .43            | .34                              | 51                                      | .89            | .68                              |
| 22                                  | .53            | .52                              | 3. Peers                                |                |                                  |
| 39                                  | .59            | .58                              | Connectedness ( $\alpha=.76$ )          |                |                                  |
| Emotional insight ( $\alpha=.60$ )  |                |                                  | 52                                      | .70            | .62                              |
| 4                                   | .27            | .19                              | 54                                      | .45            | .46                              |
| 10                                  | .31            | .31                              | 57                                      | .50            | .48                              |
| 14                                  | .38            | .26                              | 61                                      | .56            | .49                              |
| 16                                  | .66            | .36                              | 63                                      | .43            | .35                              |
| 26                                  | .22            | .27                              | 65                                      | .54            | .46                              |
| 27                                  | .32            | .34                              | 66                                      | .70            | .53                              |
| 36                                  | .61            | .37                              | Availability ( $\alpha=.73$ )           |                |                                  |
| 40                                  | .32            | .30                              | 53                                      | .61            | .54                              |
| Negative cognition ( $\alpha=.73$ ) |                |                                  | 55                                      | .62            | .49                              |
| 2                                   | .33            | .31                              | 56                                      | .58            | .50                              |
| 5                                   | .33            | .21                              | 58                                      | .62            | .48                              |
| 8                                   | .48            | .54                              | 59                                      | .44            | .40                              |
| 11                                  | .63            | .43                              | 60                                      | .30            | .24                              |
| 20                                  | .59            | .60                              | 62                                      | .45            | .36                              |
| 30                                  | .56            | .40                              | 64                                      | .53            | .48                              |
| 32                                  | .62            | .48                              | 4. School                               |                |                                  |
| 38                                  | .48            | .44                              | Supportive environment ( $\alpha=.78$ ) |                |                                  |
| Social skills ( $\alpha=.70$ )      |                |                                  | 67                                      | .66            | .63                              |
| 12                                  | .47            | .25                              | 68                                      | .54            | .58                              |
| 15                                  | .59            | .43                              | 71                                      | .53            | .54                              |
| 21                                  | .54            | .55                              | 73                                      | .43            | .37                              |
| 24                                  | .57            | .52                              | 77                                      | .67            | .42                              |
| 29                                  | .40            | .29                              | 78                                      | .71            | .53                              |
| 31                                  | .43            | .42                              | 79                                      | .41            | .38                              |
| 33                                  | .49            | .33                              | 81                                      | .50            | .47                              |
| 34                                  | .38            | .27                              | Connectedness ( $\alpha=.71$ )          |                |                                  |
| Empathy/Tolerance ( $\alpha=.38$ )  |                |                                  | 69                                      | .53            | .56                              |
| 3                                   | .53            | .22                              | 70                                      | .47            | .40                              |
| 9                                   | .26            | .25                              | 72                                      | .61            | .34                              |
| 17                                  | .21            | .20                              | 74                                      | .05            | .08                              |
| 23                                  | .16            | .12                              | 75                                      | .65            | .42                              |
| 25                                  | .26            | .09                              | 76                                      | .59            | .61                              |
| 28                                  | -.09           | .04                              | 80                                      | .53            | .51                              |
| 35                                  | .20            | .18                              | 82                                      | .37            | .30                              |
| 37                                  | .27            | .21                              | 5. Community                            |                |                                  |
| 2. Family                           |                |                                  | Connectedness ( $\alpha=.82$ )          |                |                                  |

| Domain/Scale/Item              | Factor loading | Correlation item-corrected total | Domain/Scale/Item | Factor loading | Correlation item-corrected total |
|--------------------------------|----------------|----------------------------------|-------------------|----------------|----------------------------------|
| Connectedness ( $\alpha=.84$ ) |                |                                  | 83                | .70            | .64                              |
| 41                             | .76            | .69                              | 84                | .59            | .55                              |
| 42                             | .63            | .62                              | 85                | .55            | .41                              |
| 43                             | .78            | .69                              | 86                | .74            | .70                              |
| 44                             | .70            | .69                              | 87                | .68            | .63                              |
| 45                             | .71            | .62                              | 88                | .72            | .64                              |
| 46                             | .22            | .17                              |                   |                |                                  |
